# Supplementary material
Source: PubMed Central journal article supplement (PMC7456236)
Supplement: jci-130-136068-s011.pdf [file jci-130-136068-s011.pdf]

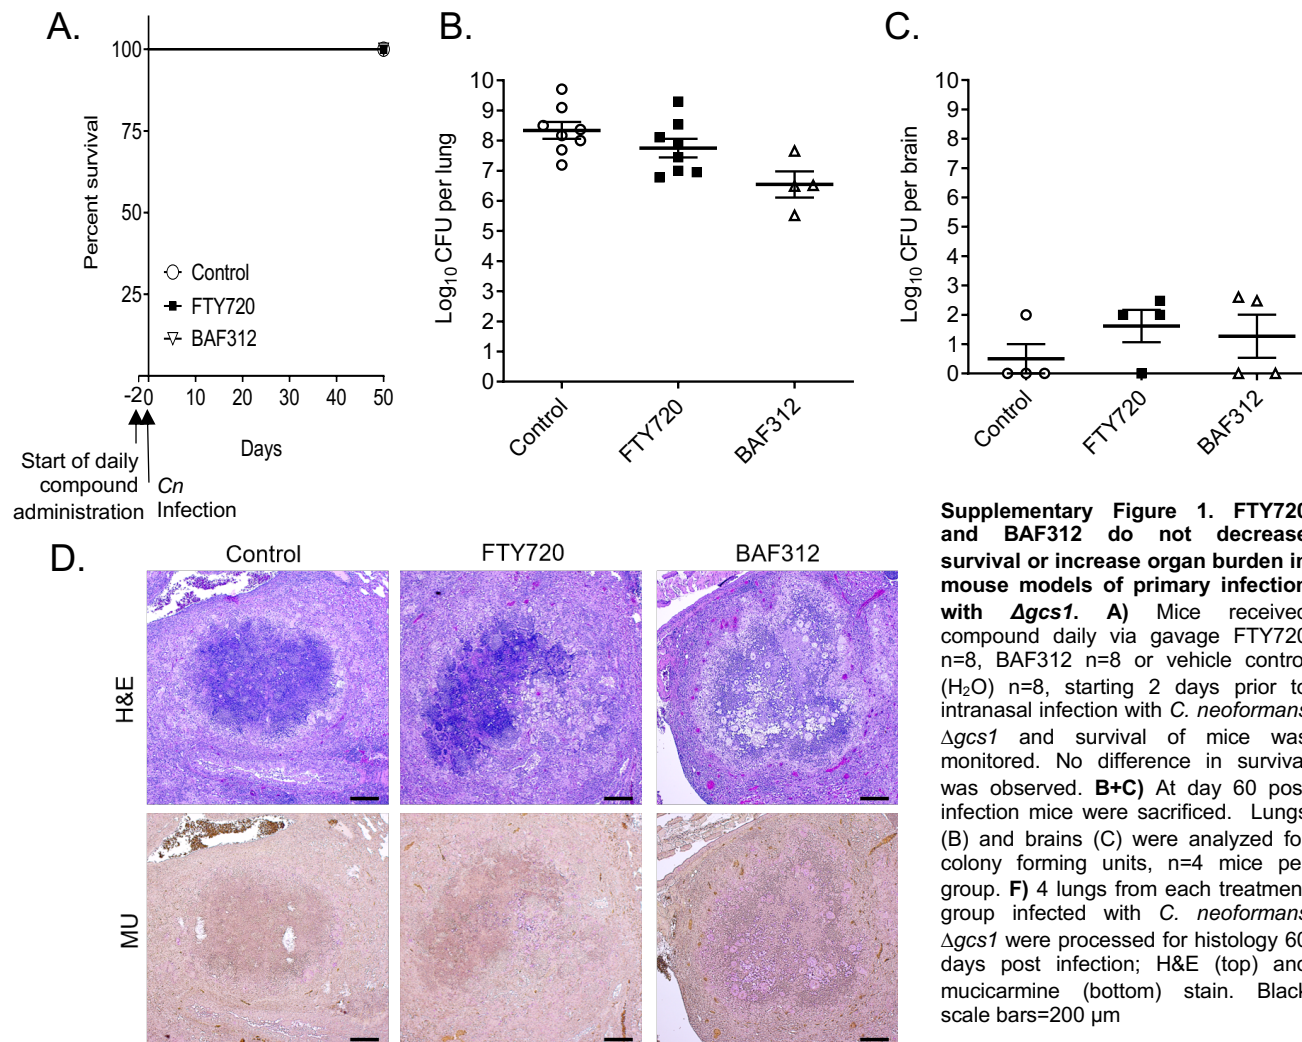

**Supplementary Figure 1. FTY720 and BAF312 do not decrease survival or increase organ burden in mouse models of primary infection with  $\Delta gcs1$ .** **A)** Mice received compound daily via gavage FTY720 n=8, BAF312 n=8 or vehicle control (H<sub>2</sub>O) n=8, starting 2 days prior to intranasal infection with *C. neoformans*  $\Delta gcs1$  and survival of mice was monitored. No difference in survival was observed. **B+C)** At day 60 post infection mice were sacrificed. Lungs (B) and brains (C) were analyzed for colony forming units, n=4 mice per group. **F)** 4 lungs from each treatment group infected with *C. neoformans*  $\Delta gcs1$  were processed for histology 60 days post infection; H&E (top) and mucicarmine (bottom) stain. Black scale bars=200 μm

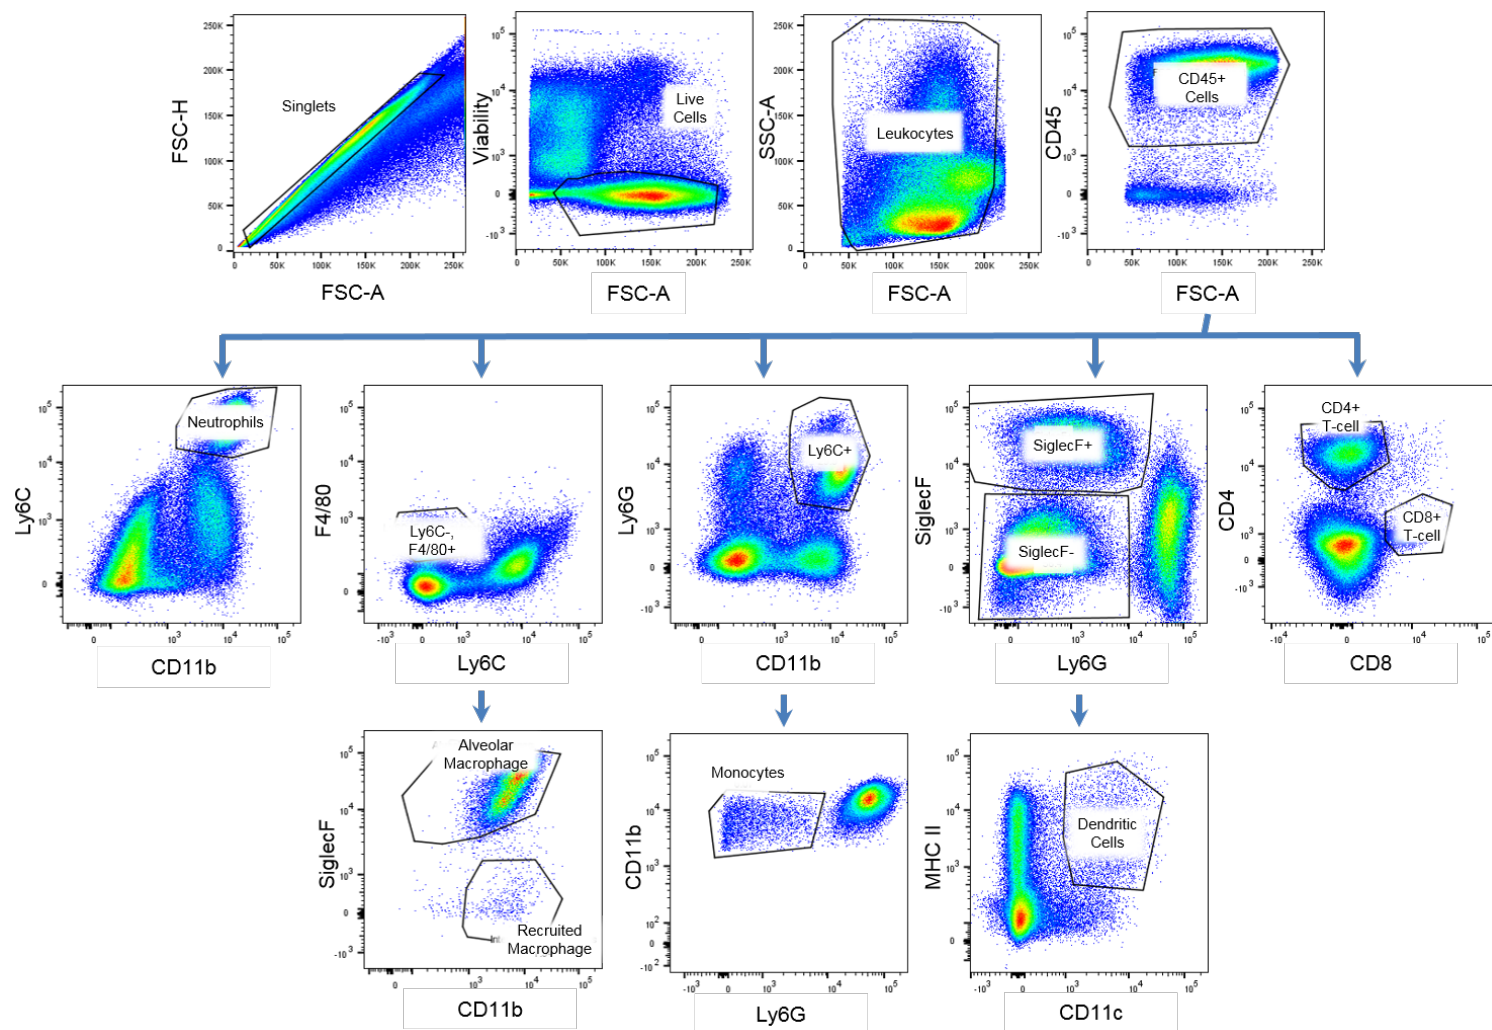

**Supplementary Figure 2. Gating strategy used for flow cytometry.** Cell populations were identified as follows, singlets were gated to remove clumped cells using Forward scatter A vs Forward scatter H. Live cells were identified by gating for Alexa Fluor 700 Carboxylic Acid, Succinimidyl Ester low cells. Leukocytes were identified by size and granularity in Forward and Side scatter. CD45 positive cells of the correct size were then selected. When intravascular staining was used, tissue cells were gated as intravascular CD45+ negative after the “leukocytes” gate. The following populations were then identified from this CD45+ subset: neutrophils (Ly6G+, CD11b+), alveolar macrophages (Ly6C-, F4/80+, SiglecF-), recruited macrophages (Ly6C-, F4/80+, SiglecF-), monocytes (Ly6C+, CD11b+, Ly6G), dendritic cells (Ly6G-, SiglecF-, MHCII+, CD11c+), CD4+ T cells (CD4+, CD8-), and CD8+ T cells (CD8+, CD4-).

| Cell Population                                              | Time point | Comparison         | Adjusted P-value |
|--------------------------------------------------------------|------------|--------------------|------------------|
| Blood CD4+ T cells (CD4+/CD8-)                               | Day 5      | Control vs. BAF312 | <0.0001          |
|                                                              |            | Control vs. FTY720 | <0.0001          |
|                                                              | Day 20     | Control vs. BAF312 | 0.0001           |
|                                                              |            | Control vs. FTY720 | 0.0002           |
| Blood CD8+ T cells (CD4-/CD8+)                               | Day 5      | Control vs. BAF312 | <0.0001          |
|                                                              |            | Control vs. FTY720 | <0.0001          |
|                                                              | Day 20     | Control vs. BAF312 | 0.0001           |
|                                                              |            | Control vs. FTY720 | 0.0003           |
| Lung CD4+ T cells (CD4+/CD8-)                                | Day 5      | Control vs. BAF312 | 0.0446           |
|                                                              |            | Control vs. FTY720 | 0.0154           |
| Lung CD8+ T cells (CD4-/CD8+)                                | Day 5      | Control vs. BAF312 | 0.0001           |
|                                                              |            | Control vs. FTY720 | 0.0001           |
|                                                              | Day 20     | Control vs. BAF312 | 0.0058           |
|                                                              |            | Control vs. FTY720 | 0.0095           |
| Lung Recruited Macrophages<br>(F4/80+/CD11b+/Ly6C-/SiglecF-) | Day 5      | Control vs. BAF312 | 0.0050           |
|                                                              |            | Control vs. FTY720 | 0.0080           |
| Lung Alveolar Macrophages<br>(F4/80+/CD11b+/Ly6C-/SiglecF+)  | Day 5      | Control vs. BAF312 | 0.0483           |
|                                                              |            | Control vs. FTY720 | 0.0436           |
|                                                              | Day 20     | Control vs. BAF312 | 0.0179           |
| Lung Dendritic Cells<br>(Ly6G-, SiglecF-, MHCII+, CD11c+)    | Day 5      | Control vs. FTY720 | 0.0428           |

**Supplementary Table 1. Adjusted P values for flow cytometry analysis.** Flow cytometry data was analyzed as follows; two-way repeated measures ANOVA was performed with the Bonferroni multiple comparisons post-hoc test. P values were corrected for multiplicity using the Bonferroni adjustment.

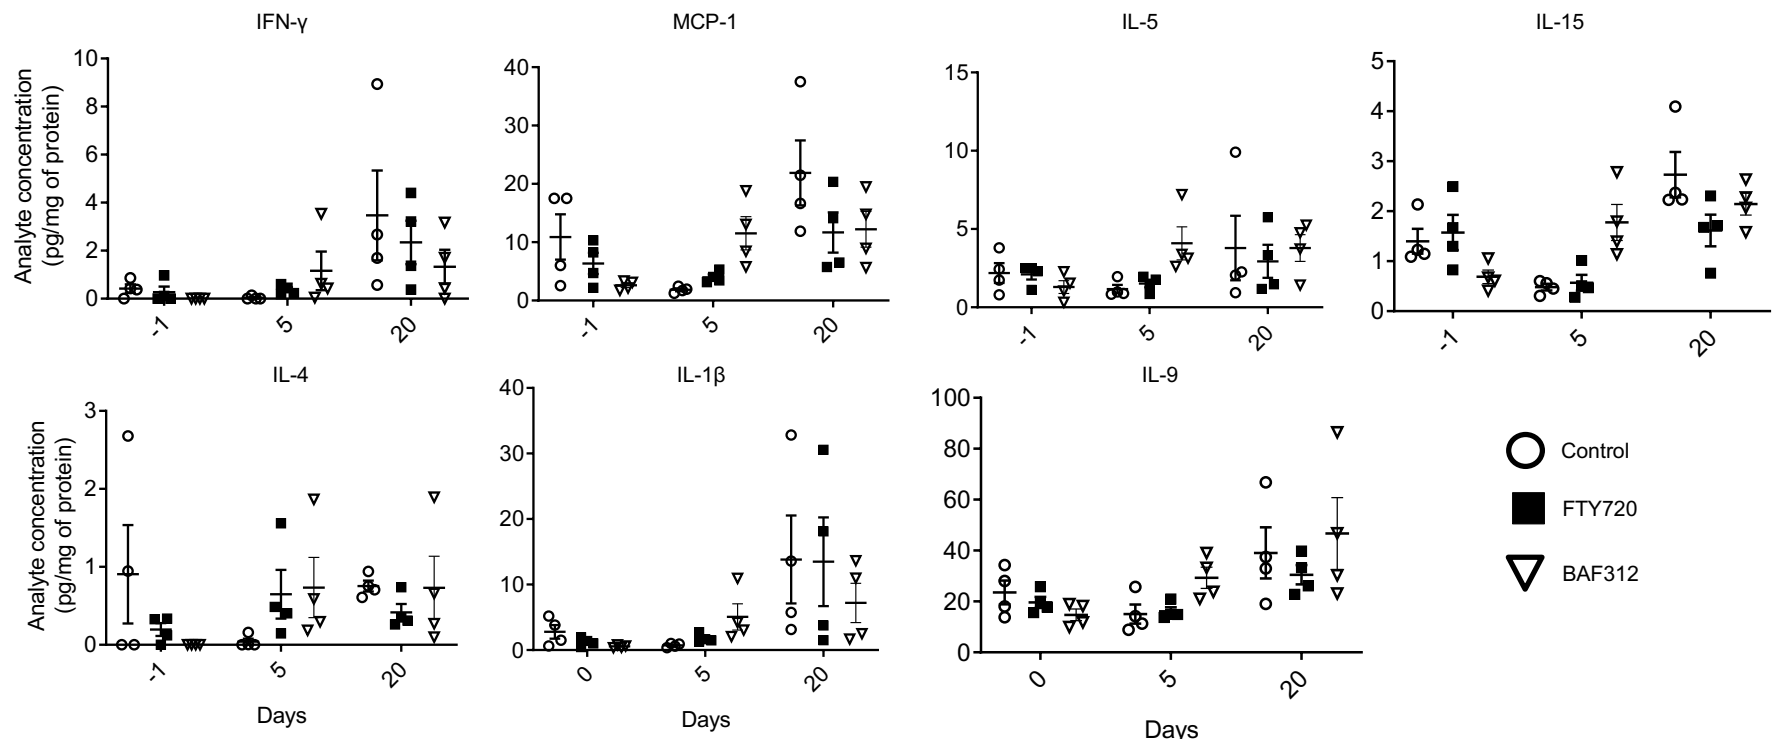

**Supplementary Figure 3. FTY720 does not induce a major change in cytokine profile compared to BAF312.** Mice were infected for thirty days with *C. neoformans*  $\Delta$ *gcs1* prior to FTY720, BAF312, or vehicle control ( $H_2O$ ) administration. For the lung analysis,  $n=4$  mice per group at each time point (prior to compound administration [Day -1], Day 5, Day 20, and Day 60 post compound administration). Cytokine levels (pg/ml) were normalized to protein concentration (mg/ml) determined by the Bradford assay. All error bars represent SEM

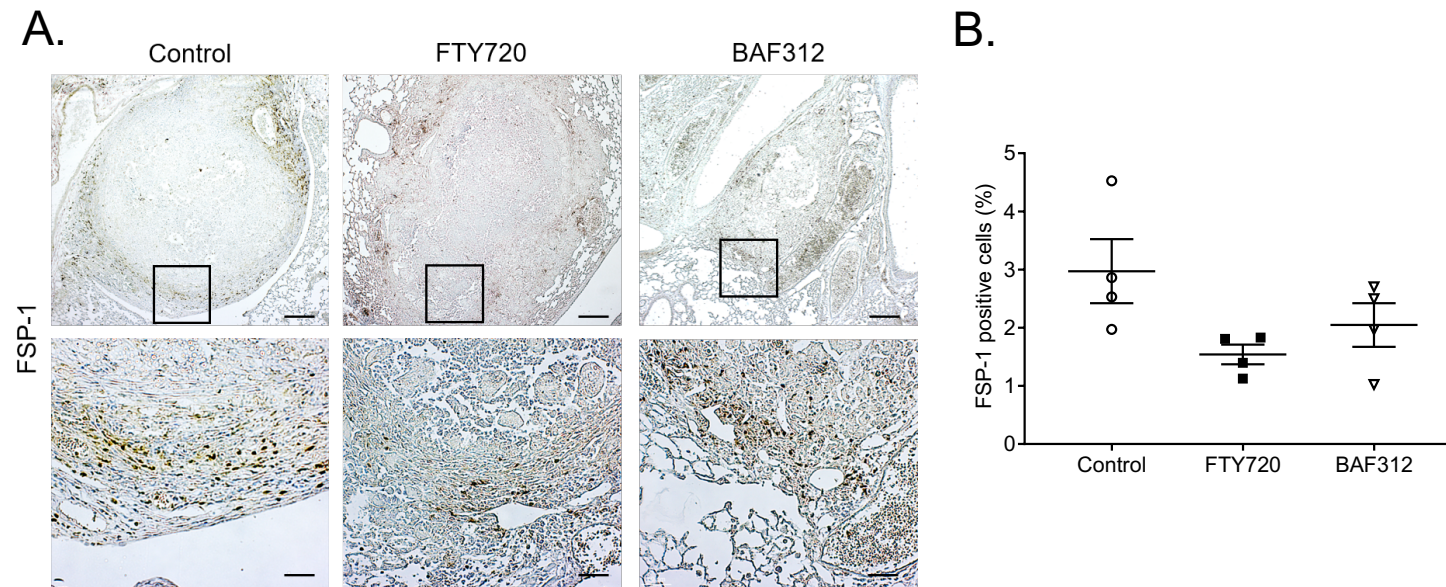

**Supplementary Figure 4. Presence of fibroblasts is not altered upon FTY720 or BAF312 administration during the reactivation model.** **A)** Mice were infected for thirty days with *C. neoformans*  $\Delta gcs1$  prior to daily compound administration. At day 60 post compound administration lungs were processed for FSP-1 immunohistochemistry. Scale bars represent 200  $\mu$ m (top) or 50  $\mu$ m (bottom). Black box indicates enlarged area. **B)** The mean percentage of FSP-1 positive cells was quantified using Image J software, n=4. All error bars represent SEM.

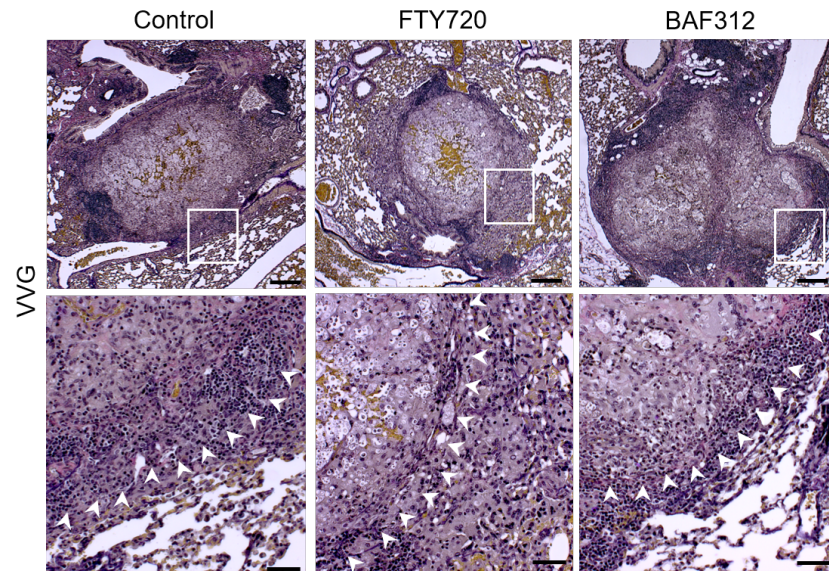

**Supplementary Figure 5. Elastin and collagen deposition is not altered upon FTY720 or BAF312 administration during the reactivation model.** At day 50 post compound administration, lungs were processed for histology and VVG stain. For the top row the scale bar=200  $\mu$ m. For the bottom row the scale bar=50  $\mu$ m. The white boxes indicate enlarged area and the white arrowheads denote the area of collagen and elastin deposition.

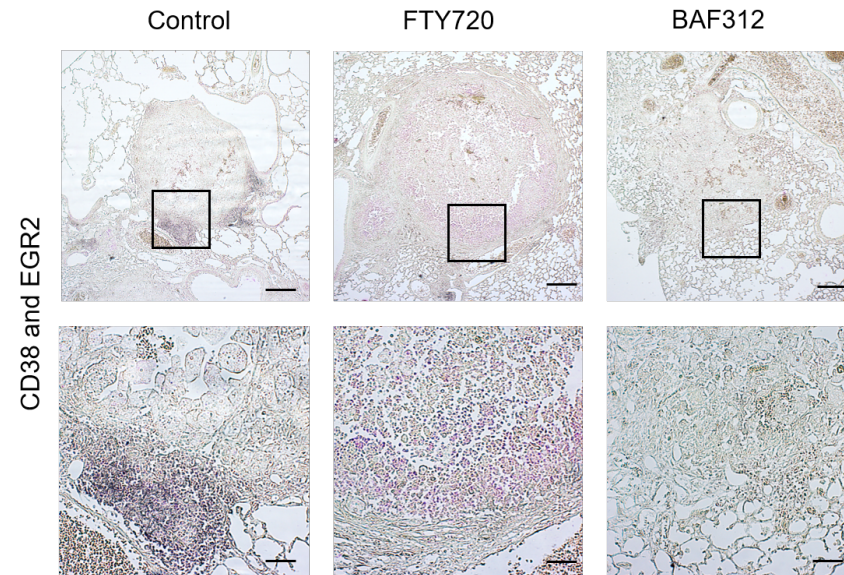

**Supplementary Figure 6. Treatment with FTY720, but not BAF312 induces M2 polarization in the granuloma structure. A)** Mice were infected for thirty days with *C. neoformans*  $\Delta$ *gcs1* prior to daily compound administration. At day 60 post compound administration lungs were processed for CD38 (gray) and EGR2 (magenta) immunohistochemistry.

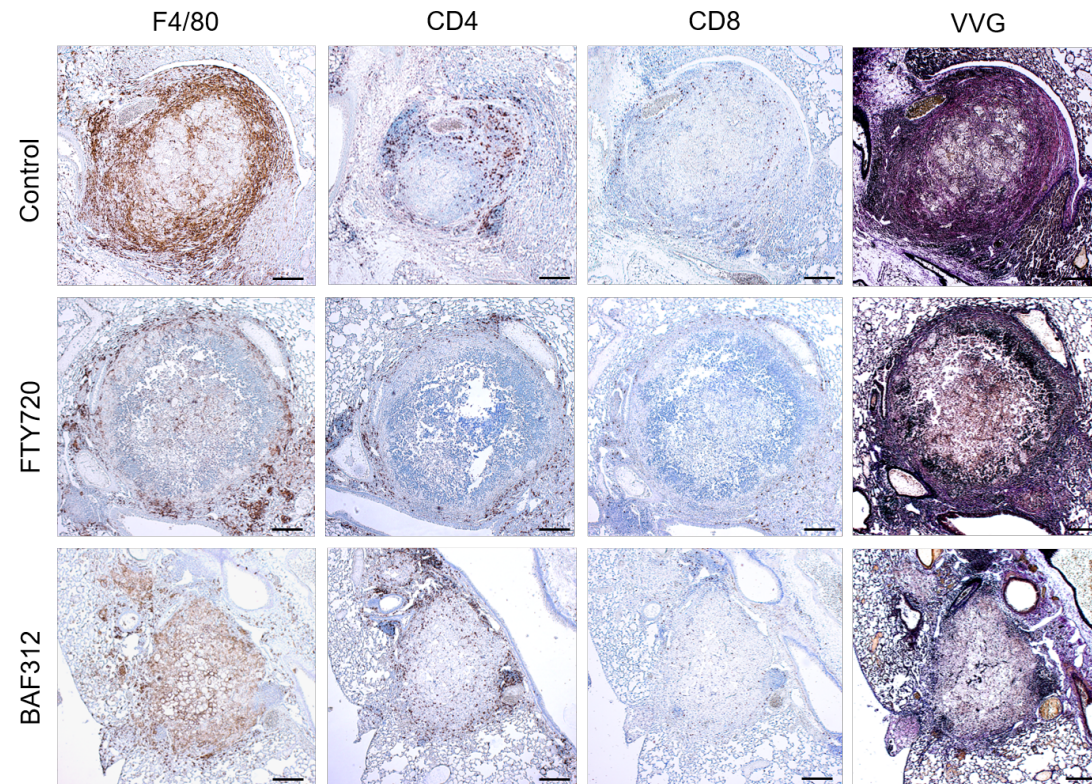

**Supplementary Figure 7. T cells remain present in lung granulomas after FTY720 and BAF312 administration.** Mice were infected for thirty days with *C. neoformans*  $\Delta gcs1$  prior to daily compound administration. At day 60 post compound administration lungs were processed for F4/80, CD4, or CD8 immunohistochemistry and VVG staining. Scale bars represent 200  $\mu$ m.

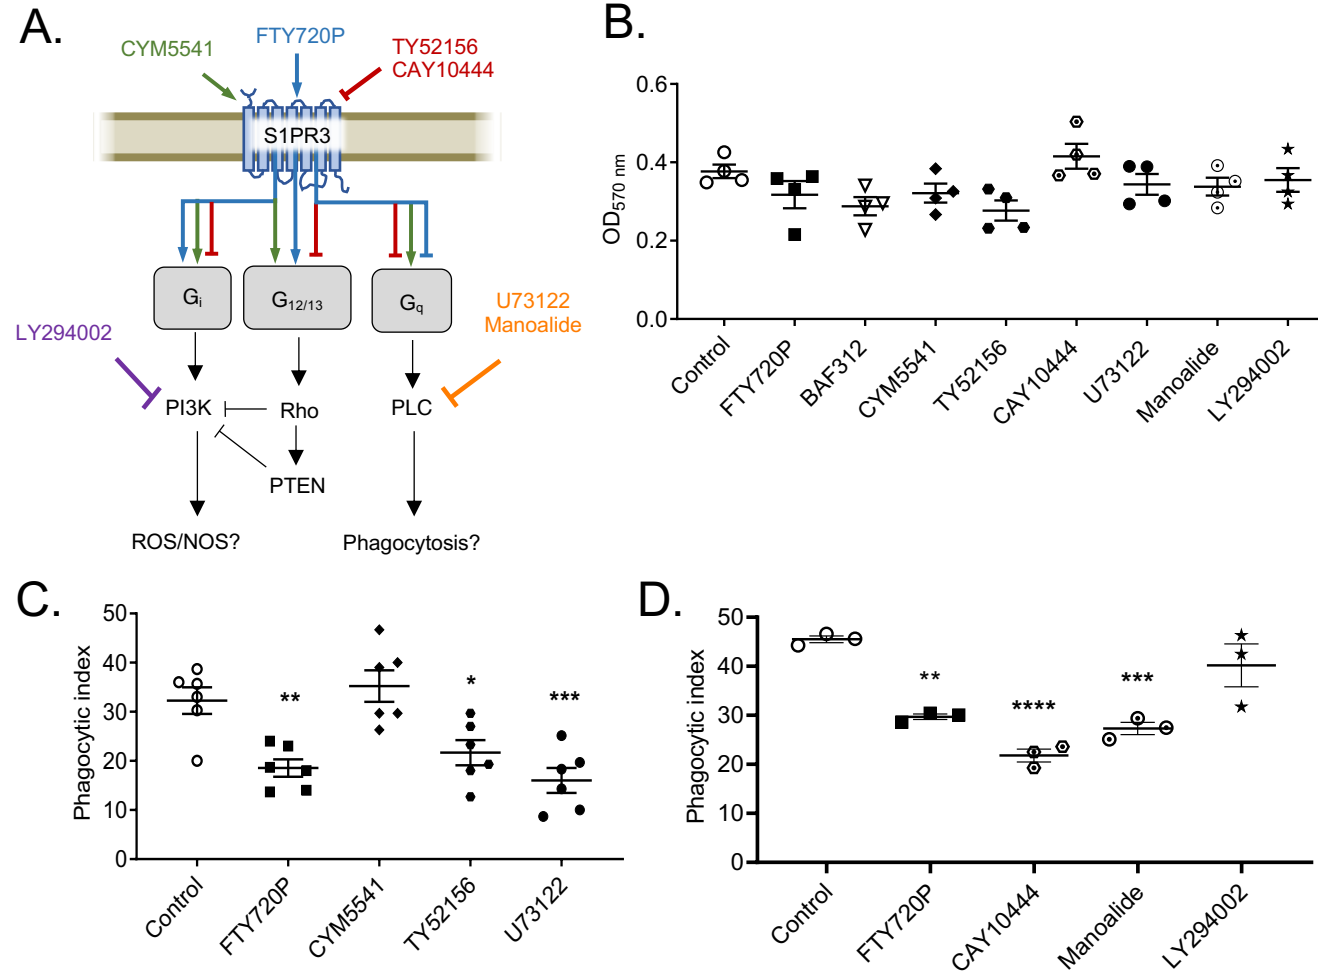

**Supplementary Figure 8. FTY720 impairs phagocytosis in macrophages mediated by S1Pr3/Gq signaling pathway** **A)** A schematic of pathways downstream of S1PR3 and the potential downstream pathways in macrophages as well as the reported activity of the compounds used in Supplementary Figure 8 are shown. **B)** Alveolar macrophage cell line MH-S was treated with 1  $\mu$ M of indicated compound for 1 hour, n=4. In vitro cytotoxicity was evaluated using the MTT cell viability assay. Experiment was conducted 2 times. **C+D)** MH-S cells were treated with 1  $\mu$ M of indicated compound for 1 hour (n=6 for C and n=3 for D) and subsequently co-incubated with opsonized *C. neoformans*  $\Delta$ *gcs1* and phagocytic index was calculated by microscopic observation. For D, experiment was conducted 2 times. All error bars represent SEM and statistical comparisons were done using the one-way ANOVA with Bonferroni's multiple comparisons post-hoc test. P-values were corrected for multiplicity using the Bonferroni adjustment. (C: \*\* $P=0.0039$  for control vs. FTY720P, \* $P=0.0318$  for control vs. TY52156, and \*\*\* $P=0.0007$  for control vs. U73122. D: \*\* $P=0.0016$  for control vs. FTY720P, \*\*\*\* $P<0.0001$  for control vs. CAY10444, and \*\*\* $P=0.0005$  for control vs. Manoalide).

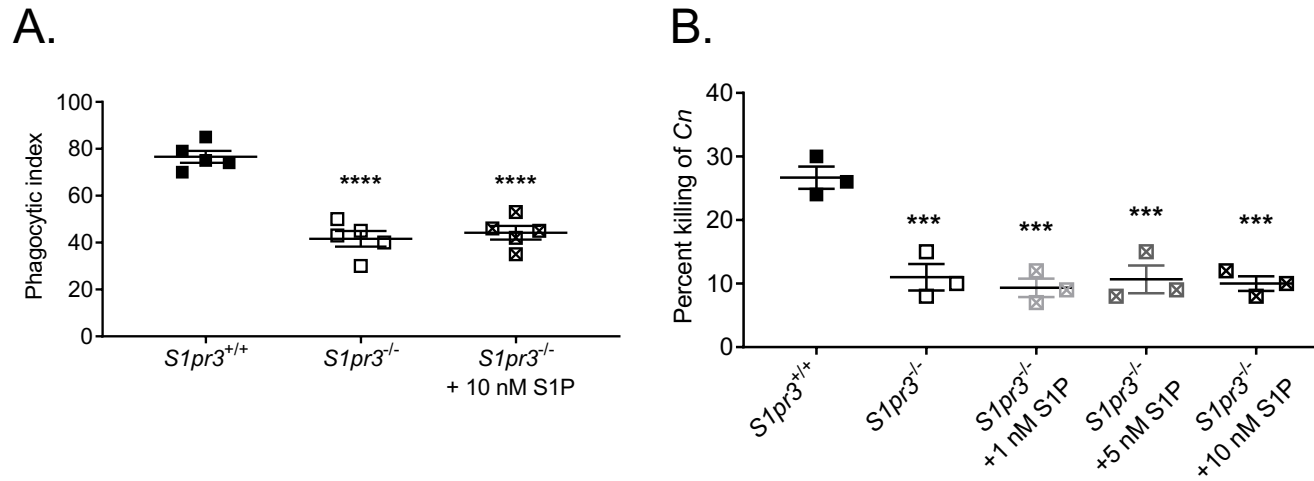

**Supplementary Figure 9. S1P/S1Pr3 signaling is required for phagocytosis and intracellular killing of *C. neoformans* H99** **A)** Primary alveolar macrophages isolated from wild type and S1Pr3 deficient mice with and without S1P supplementation were co-incubated with opsonized *C. neoformans* H99 and phagocytic index was calculated by microscopic observation (n=5 each). Experiment was conducted 3 times. **B)** Primary alveolar macrophages isolated from mice of indicated genotype (n=3) with and without S1P supplementation were co-incubated with opsonized *C. neoformans*  $\Delta gcs1$ . After incubation, culture media were plated onto YPD agar. Percent killing was calculated as the difference in colony forming units (CFU's) of H99 incubated with vs. without macrophages. Experiment was conducted 5 times. All error bars represent SEM and statistical comparisons were done using one-way ANOVA with Bonferroni's multiple comparisons post-hoc test. P-values were corrected for multiplicity using the Bonferroni adjustment (B: \*\*\*\* $P < 0.0001$  compared to the control, C: \*\*\* $P < 0.001$  compared to the control).
